# Supplementary material
Source: PubMed Central journal article supplement (PMC3799332)
Supplement: 1316622110_pnas.201316622SI.pdf [file 1316622110_pnas.201316622SI.pdf]

# Supporting Information

Huang et al. 10.1073/pnas.1316622110

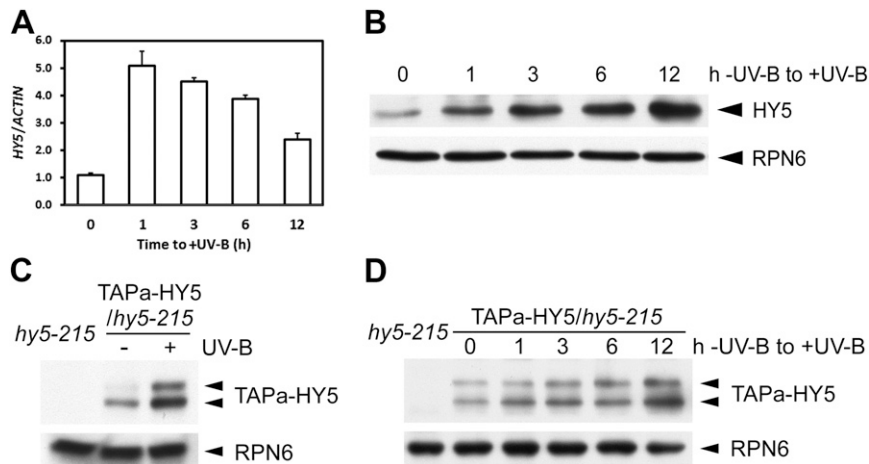

**Fig. S1.** (A and B) The mRNA (A) and protein (B) levels of ELONGATED HYPOCOTYL 5 (HY5) in response to photomorphogenic UV-B irradiation in Columbia (Col) seedlings grown under -UV-B for 4 d and then transferred to +UV-B for the indicated time. REGULATORY PARTICLE NON-ATPASE 6 (RPN6) is the loading control. (C and D) The effect of photomorphogenic UV-B on HY5 protein accumulation. Immunoblot analysis using 4-d-old alternative tandem affinity purification tag (TAPa-HY5)/*hy5-215* seedlings grown under -UV-B and +UV-B (C) or transferred from -UV-B to +UV-B for the indicated time (D).

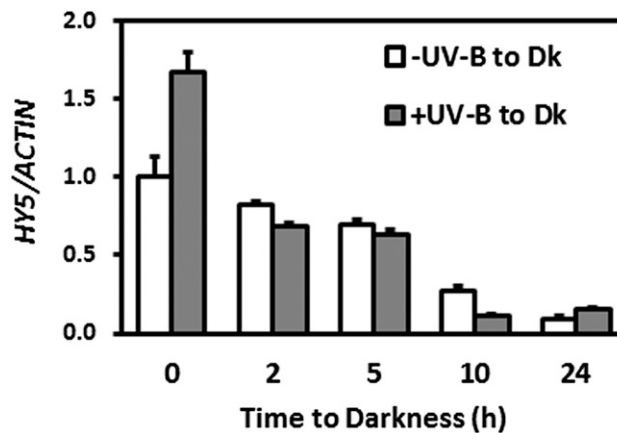

**Fig. S2.** The mRNA levels of *HY5* in Col seedlings grown under -UV-B or +UV-B for 4 d and then transferred to darkness for the indicated time.

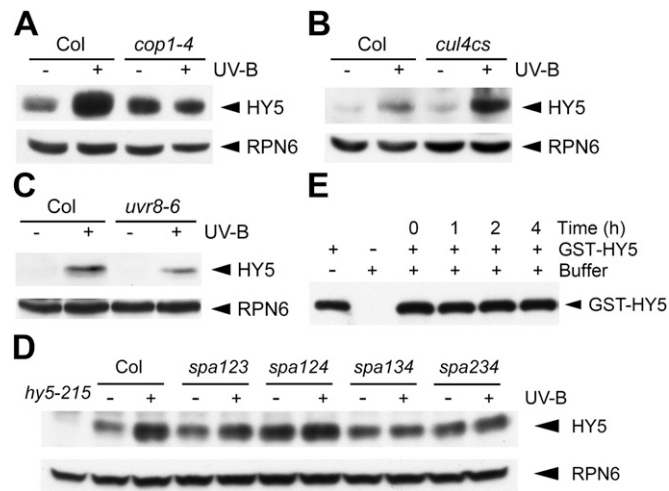

**Fig. S3.** The protein levels of HY5 in 4-d-old -UV-B- and +UV-B-grown seedlings of Col, *cop1-4* (A), *cul4cs* (B), *uvr8-6* (C), and *spa* (D) mutants. (E) Immunoblot analysis of recombinant GST-HY5 in the cell-free degradation buffer without cell extracts at 22 °C for the indicated time.

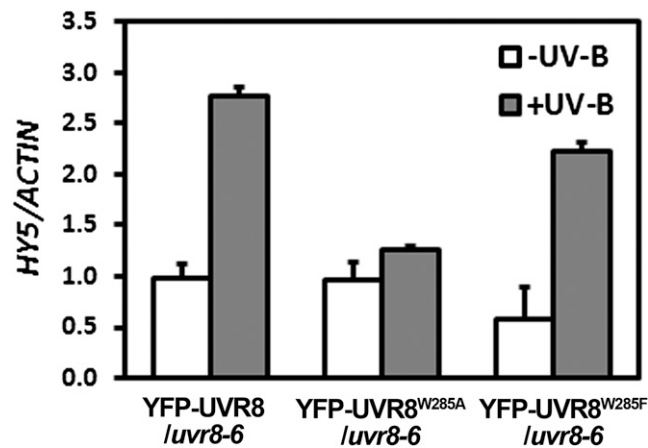

**Fig. S4.** The mRNA levels of *HY5* in 4-d-old -UV-B- and +UV-B-grown seedlings of YFP-UV RESISTANCE LOCUS 8 (UVR8)/*uvr8-6*, YFP-UVR8<sup>W285A</sup>/*uvr8-6*, and YFP-UVR8<sup>W285F</sup>/*uvr8-6*.

**Table S1. Summary of primers used in this study**

| Assay                           | Construct                                                  | Primer ID           | Primer sequence                               |
|---------------------------------|------------------------------------------------------------|---------------------|-----------------------------------------------|
| Generation of transgenic plants | pF3PZPY122-UVR8                                            | UVR8 5' KpnI        | ATACGGTACCATGGCGGAGGATATGGCT                  |
|                                 | pJIM 19 (KAN)-FLAG-UVR8                                    | UVR8 3' XhoI SacI   | ATACCTCGAGGAGCTCTCAAATTCGTACACGCTT            |
|                                 | pEarleyGate 104- <i>proUVR8</i> -YFP-UVR8                  | proUVR8 5' AflIII   | ATACCTTAAGGTATATAGTACTTCCAATGGC               |
|                                 |                                                            | proUVR8 3' AatII    | ATACGACGTCATCACAGTTGCAGTTTTTACAAG             |
|                                 | pEarleyGate 104- <i>proUVR8</i> -YFP-UVR8 <sup>W285A</sup> | UVR8 W285A-F        | TCTCCCAGATTCGGGAGGTGCGAGACATACAATGGCATTGACTT  |
|                                 |                                                            | UVR8 W285A-R        | AAGTCAATGCCATTGTATGTCTCGCACCTCCCGAAATCTGGGAGA |
|                                 | pEarleyGate 104- <i>proUVR8</i> -YFP-UVR8 <sup>W285F</sup> | UVR8 W285F-F        | TCTCCCAGATTCGGGAGGTTTTAGACATACAATGGCATTGACTT  |
| qRT-PCR                         |                                                            | UVR8 W285F-R        | AAGTCAATGCCATTGTATGTCTAAAACCTCCCGAAATCTGGGAGA |
|                                 |                                                            | CHS-F               | ACGTCACGTGTTGAGCGAGTATGG                      |
|                                 |                                                            | CHS-R               | GAGGAACGCTGTGCAAGACGACTG                      |
|                                 |                                                            | At4g15480-F         | AGTCGGGTTTATCGTTCT                            |
|                                 |                                                            | At4g15480-R         | ATCCCTTACCTTTAGCAC                            |
|                                 |                                                            | ELIP2-F             | CACCACAAATGCCACAGTCT                          |
|                                 |                                                            | ELIP2-R             | TGCTAGTCTCCCGTTGATCC                          |
|                                 |                                                            | HY5-F               | TCAGAACGAGAACCAGATGCTTAG                      |
|                                 |                                                            | HY5-R               | TTAGAACCACCACCACCTCCTC                        |
|                                 | Yeast three-hybrid                                         | pGADT7-COP1 (no AD) | Y3H COP1 5' KpnI                              |
| Y3H COP1 3' EcoRI               |                                                            |                     | ATACGAATTCTCACGCAGCGAGTACCAGAACT              |

AD, activation domain; COP1, CONSTITUTIVE PHOTOMORPHOGENESIS 1.
